# Supplementary material for: A deoxygenation-switch-based red-emitting fluorogenic light-up probe for the detection of highly toxic free bilirubin in human blood serum
Source: Royal Society of Chemistry journal article supplement (doi:10.1039/d1ay01717a), 2021-01-01
Supplement: d1ay01717a1.pdf [file d1ay01717a1.pdf]

*Supplementary material for*

**Deoxygenation switch embedded red-emitting fluorogenic light-up probe for detection of highly toxic free bilirubin in human blood serum**

Ejaj Ahmmed<sup>a</sup>, Asit Mondal<sup>a</sup>, Nimai Chandra Saha<sup>b</sup>, Koushik Dhara<sup>c</sup>, Pabitra Chattopadhyay<sup>a,\*</sup>

<sup>a</sup> Department of Chemistry, The University of Burdwan, Burdwan-713104, West Bengal, India

<sup>b</sup> Vice Chancellor's Research Group, The University of Burdwan, Burdwan, West Bengal, 713104, India

<sup>c</sup> Department of Chemistry, Sambhu Nath College, Labpur, Birbhum 731303, West Bengal, India

**Corresponding author**

Pabitra Chattopadhyay - Department of Chemistry, The University of Burdwan, Burdwan 713 104, West Bengal, India, [orcid.org/0000-0002-5923-7462](https://orcid.org/0000-0002-5923-7462); Email: [pabitracc@yahoo.com](mailto:pabitracc@yahoo.com), Fax: +91-342-2530452

## Table of content:

**Fig. S1.** FT-IR spectrum of DEB

**Fig. S2.** <sup>1</sup>H NMR spectrum of DEB in *d*<sub>6</sub>-DMOS

**Fig. S3.** <sup>13</sup>C NMR spectrum of DEB in *d*<sub>6</sub>-DMOS

**Fig. S4.** High resolution mass spectrum of DEB

**Fig. S5.** FT-IR spectrum of Ac-DEB

**Fig. S6.** <sup>1</sup>H NMR spectrum of Ac-DEB in CDCl<sub>3</sub>

**Fig. S7.** <sup>13</sup>C NMR spectrum of Ac-DEB in CDCl<sub>3</sub>

**Fig. S8.** High resolution mass spectrum of Ac-DEB

**Fig. S9.** FT-IR spectrum of Ac-DEBNox in KBr plate

**Fig. S10.** <sup>1</sup>H NMR spectrum of Ac-DEBNox in CDCl<sub>3</sub>

**Fig. S11.** <sup>13</sup>C NMR spectrum of Ac-DEBNox in *d*<sub>6</sub>-DMOS

**Fig. S12.** High resolution mass spectrum of Ac-DEBNox

**Fig. S13.** FT-IR spectrum of DEBNox

**Fig. S14.** <sup>1</sup>H NMR spectrum of DEBNox in CDCl<sub>3</sub>

**Fig. S15.** <sup>13</sup>C NMR spectrum of DEBNox in *d*<sub>6</sub>-DMOS

**Fig. S16.** High resolution mass spectrum of DEBNox

**Fig. S17.** Naked eye color change of DEBNox towards bilirubin

**Fig. S18.** The fluorescence enhancing behavior of DEBNox towards bilirubin

**Fig. S19.** Paper-strip test of DEBNox using bilirubin

**Fig. S20.** Fluorescence intensity (at 623 nm) vs bilirubin concentration plot

**Table S1.** Free bilirubin determination in different human blood serum specimens

**Table S2.** Comparative study with various reported fluorogenic probes for bilirubin detection

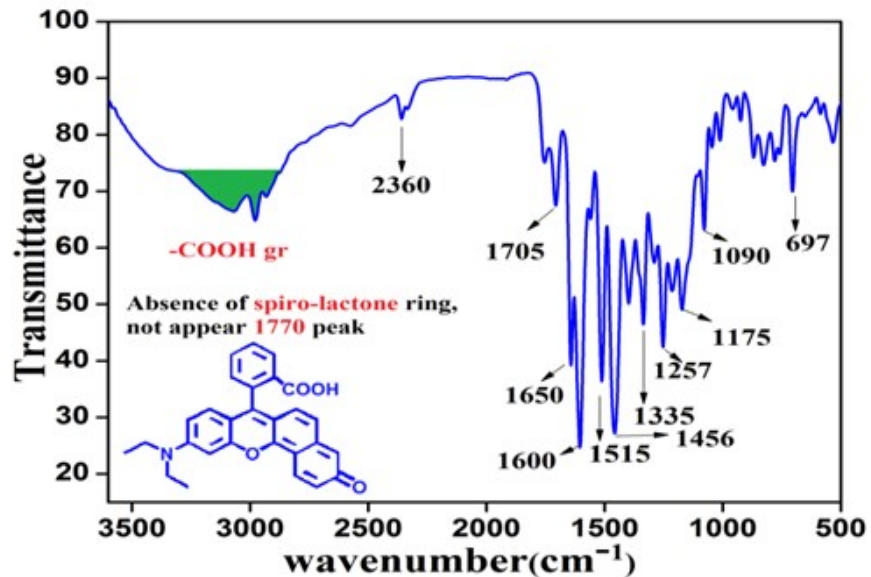

Fig. S1. FT-IR spectrum of DEB.

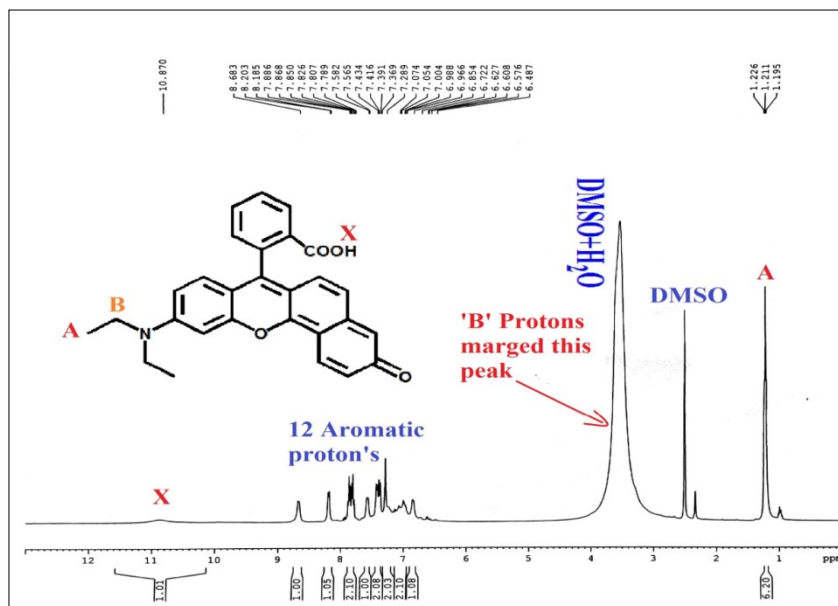

Fig. S2. <sup>1</sup>H NMR spectrum of DEBind<sub>6</sub>-DMSO.



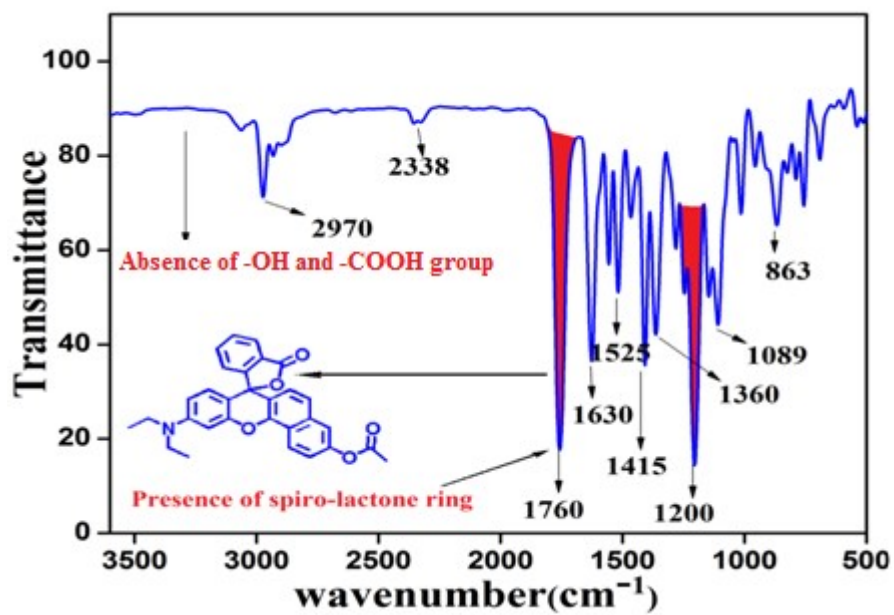

Fig. S5. FT-IR spectrum of Ac-DEB.

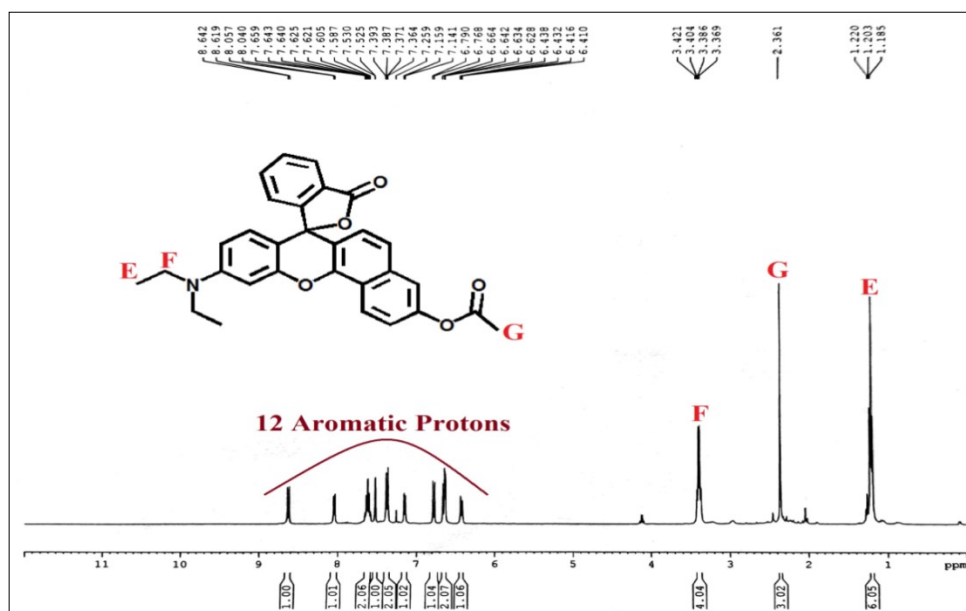

Fig. S6. <sup>1</sup>H NMR spectrum of Ac-DEB in CDCl<sub>3</sub>.

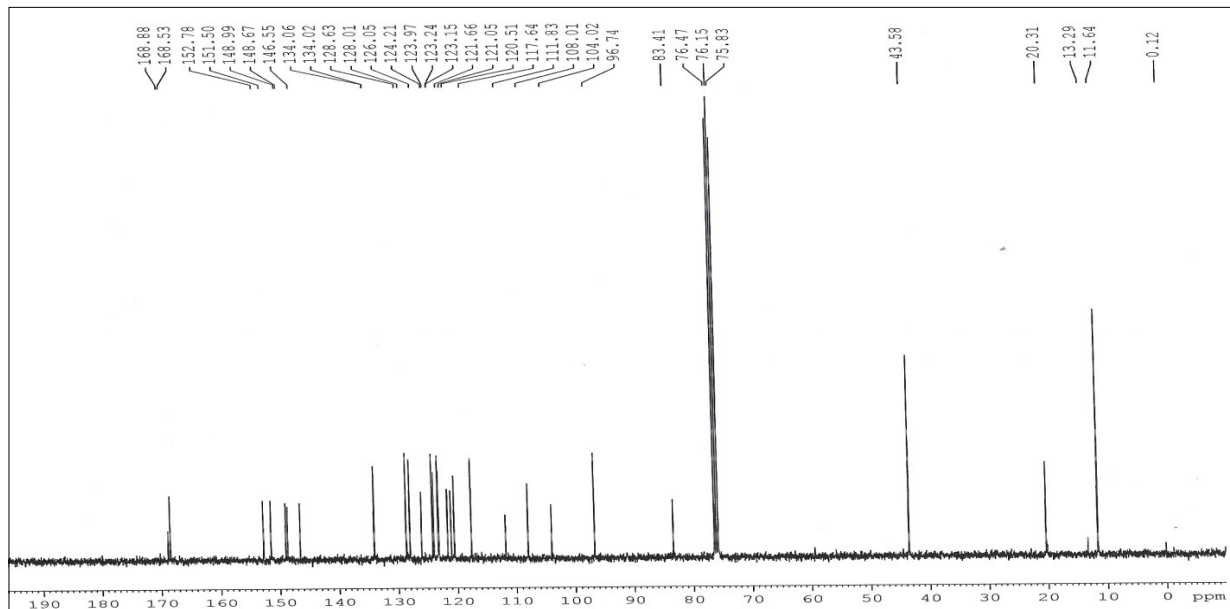

**Fig. S7.**  $^{13}\text{C}$  NMR spectrum of Ac-DEB in  $\text{CDCl}_3$ .

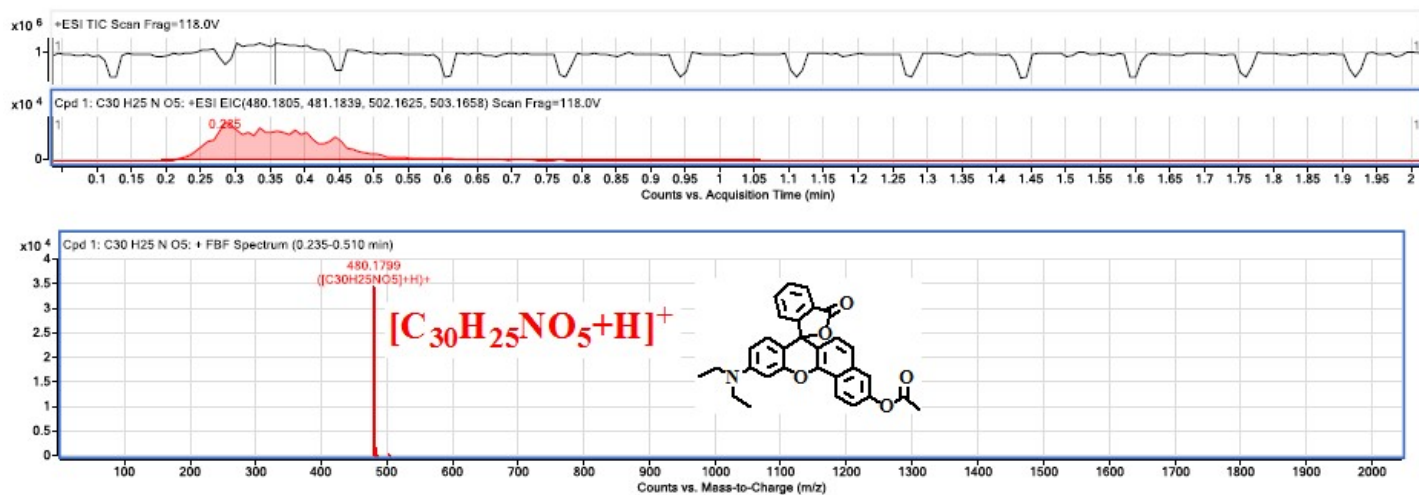

**Fig. S8.** High resolution mass spectrum of Ac-DEB.



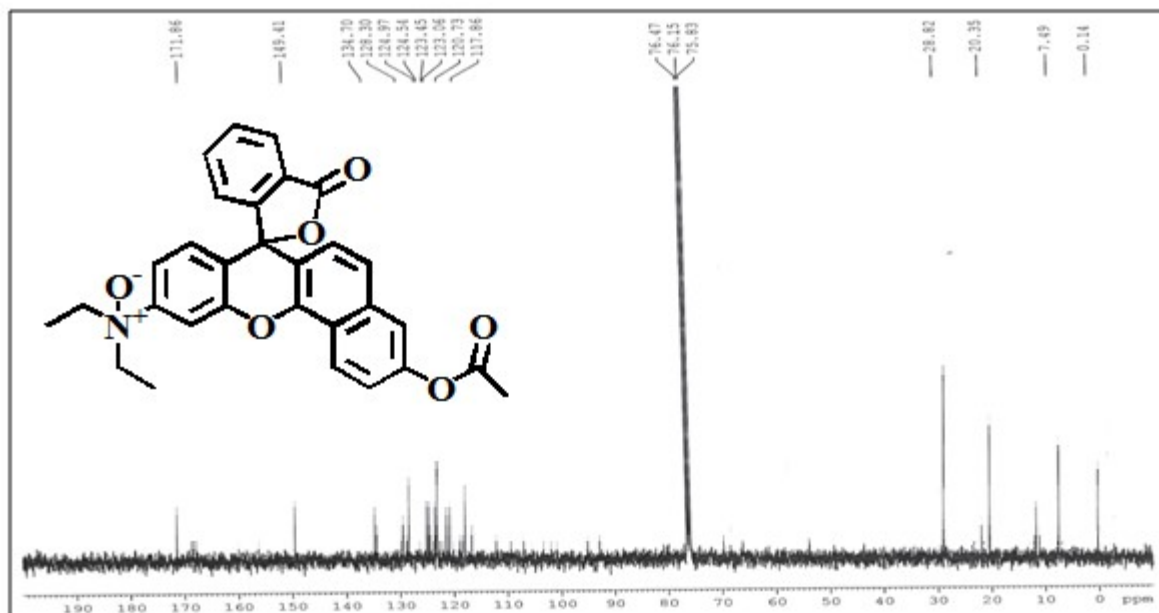

**Fig. S11.** <sup>13</sup>C NMR spectrum of Ac-DEBNox in *d*<sub>6</sub>-DMSO.

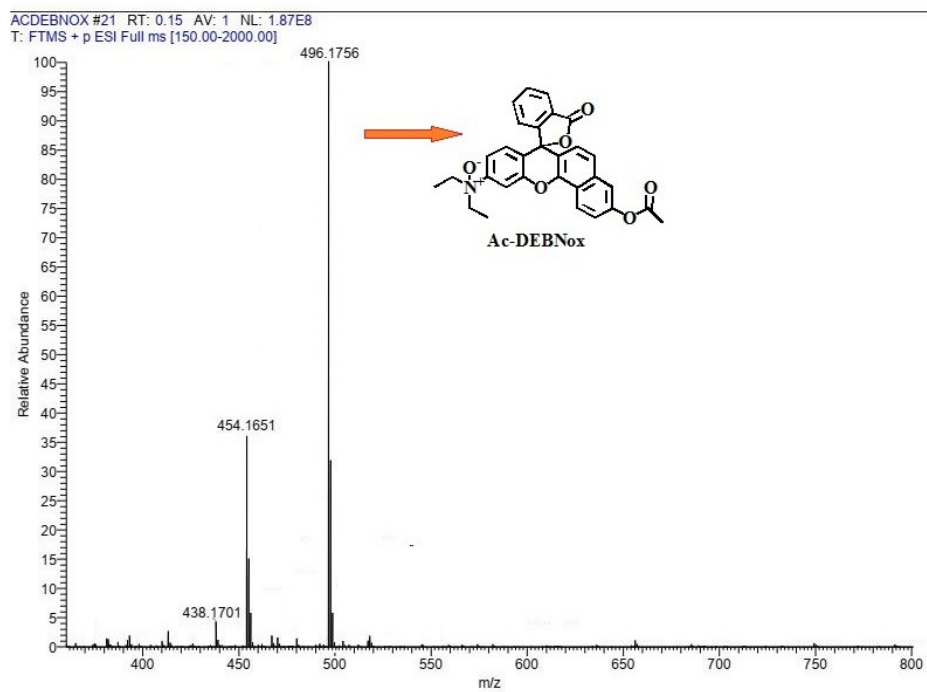

**Fig. S12.** High resolution mass spectrum of Ac-DEBNox.



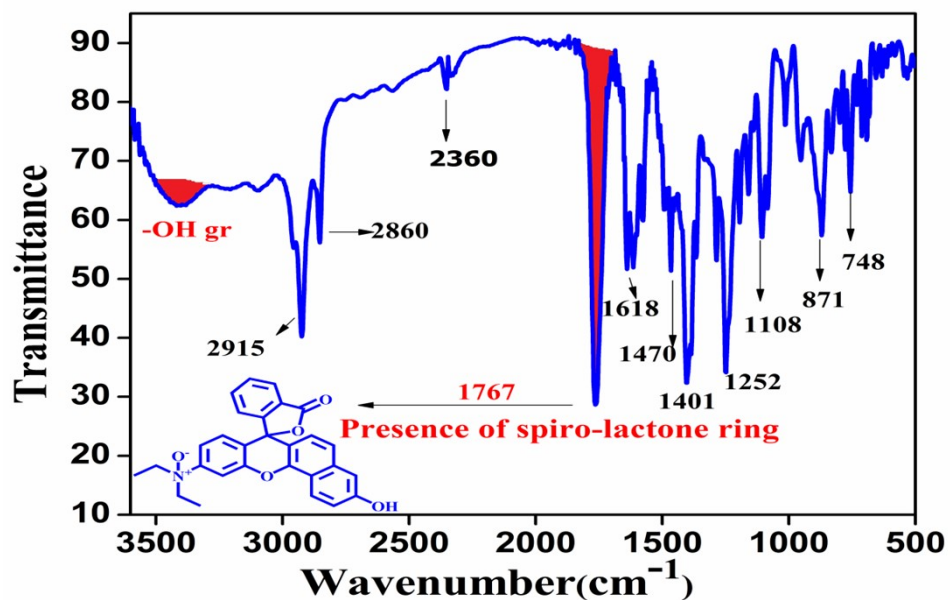

Fig. S13. FT-IR spectrum of DEBNox.

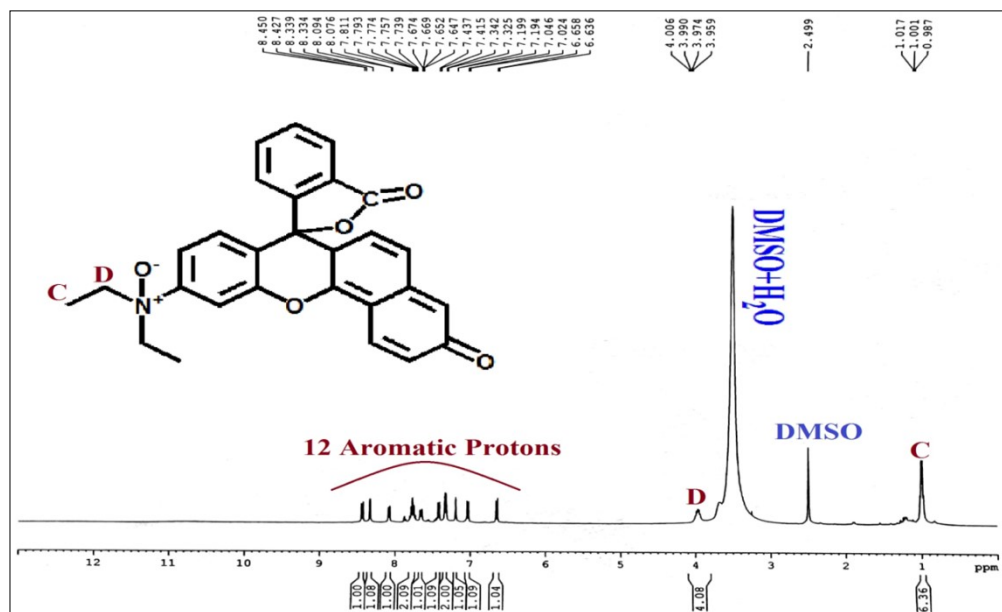

Fig. S14.  $^1\text{H}$  NMR spectrum of DEBNox in  $\text{CDCl}_3$

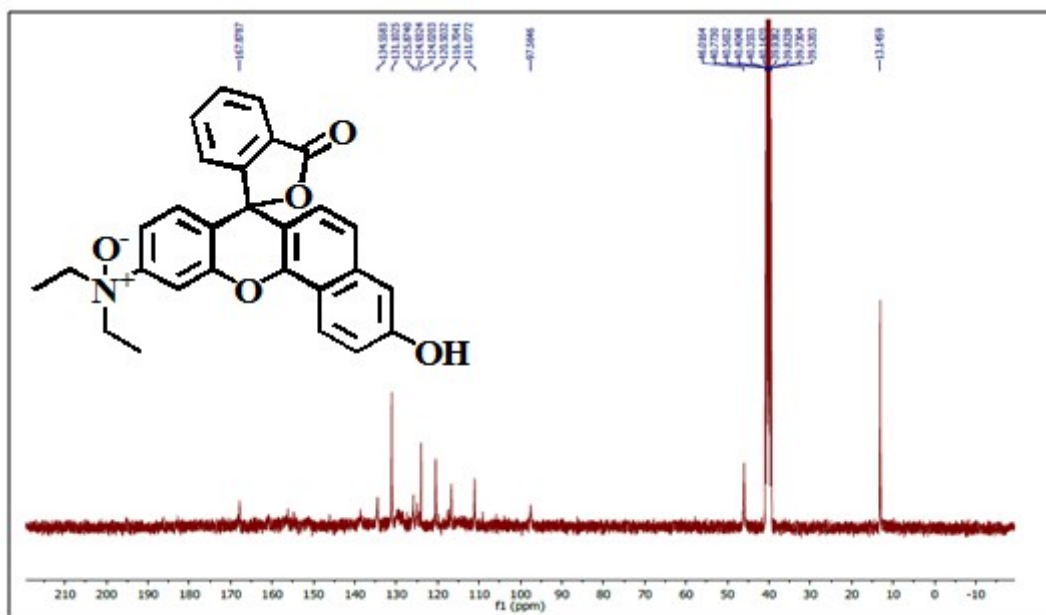

Fig. S15.  $^{13}\text{C}$ NMR spectrum of DEBNox in  $d_6$ -DMSO.

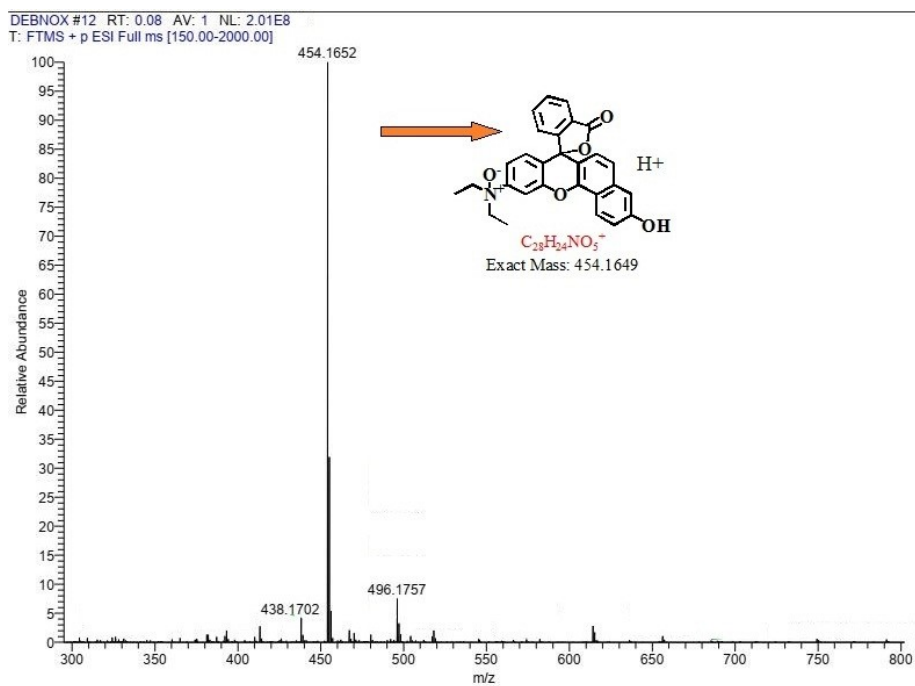

Fig. S16. High resolution mass spectrum of DEBNox.

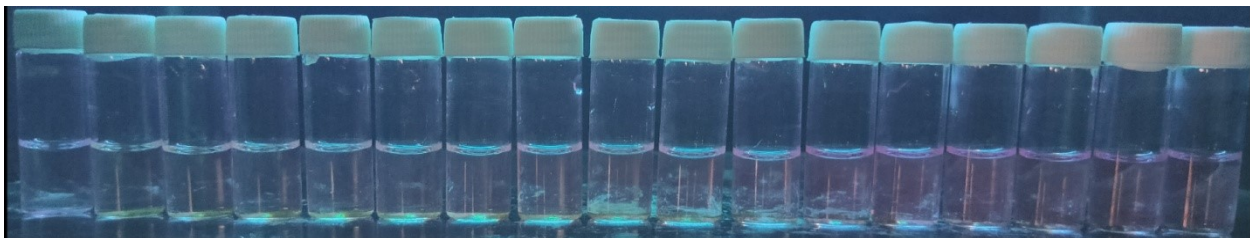

**Fig. S17.** Naked eye color change of DEBNox (10  $\mu\text{M}$ ) towards increasing concentration of bilirubin in reaction buffer (50 mM HEPES, 5% DMSO, pH 7.4) at 27  $^{\circ}\text{C}$  in presence of 100  $\mu\text{M}$   $\text{Fe}^{3+}$ .

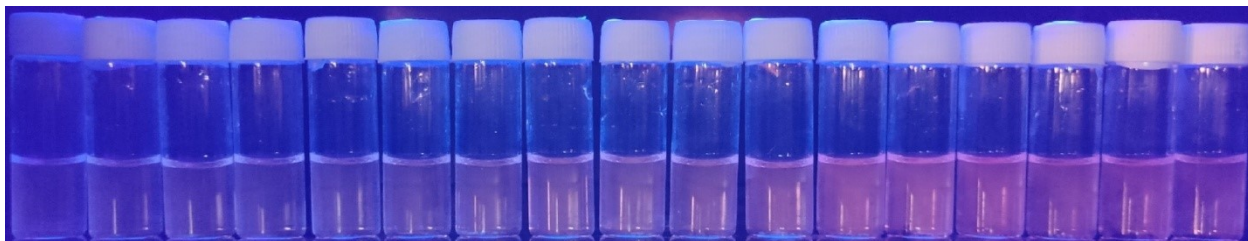

**Fig. S18.** The fluorescence enhancement behavior of DEBNox (10  $\mu\text{M}$ ) towards the increasing concentration of bilirubin (0 - 10  $\mu\text{M}$ ) in reaction buffer (50 mM HEPES, 5% DMSO, pH- 7.4) at 27  $^{\circ}\text{C}$  in presence of 100  $\mu\text{M}$   $\text{Fe}^{3+}$ .

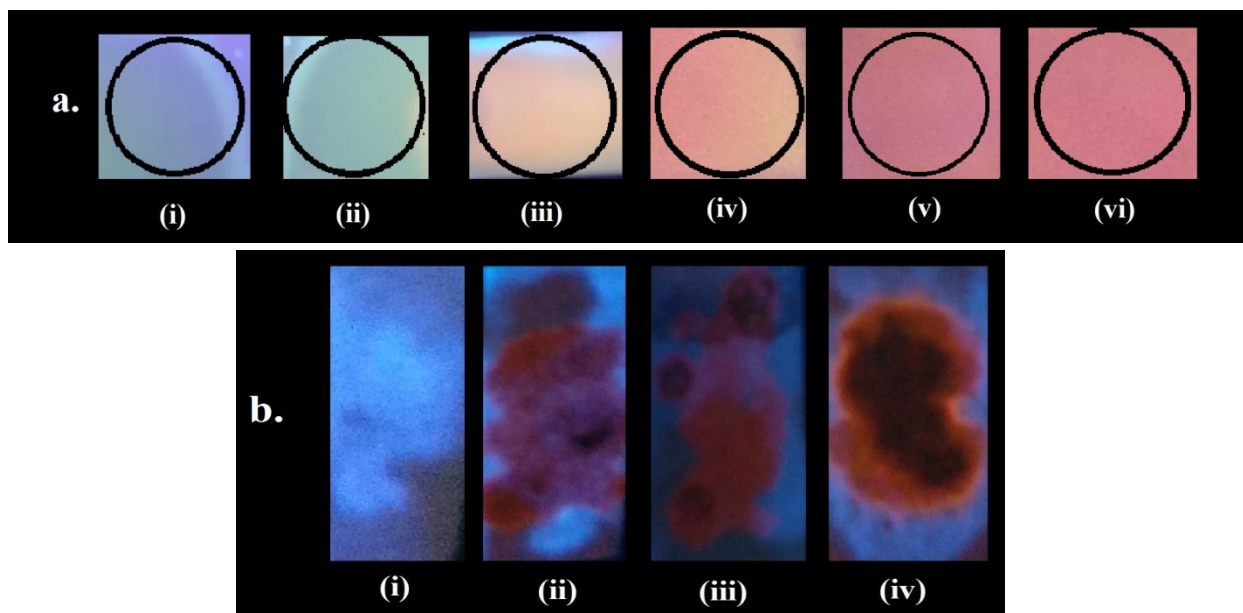

**Fig. S19.** (a) Paper-strip test with 20  $\mu\text{M}$  DEBNox and 100  $\mu\text{M}$   $\text{Fe}^{3+}$  with different concentrations of bilirubin: (i) DEBNox, (ii) DEBNox + 100  $\mu\text{M}$   $\text{Fe}^{3+}$ , (iii) DEBNox +  $\text{Fe}^{3+}$  + 2.5  $\mu\text{M}$  bilirubin, (iv) DEBNox +  $\text{Fe}^{3+}$  + 5  $\mu\text{M}$  bilirubin, (v) DEBNox +  $\text{Fe}^{3+}$  + 7.5  $\mu\text{M}$  bilirubin, (vi) DEBNox +  $\text{Fe}^{3+}$  + 10  $\mu\text{M}$  bilirubin. (b) different human blood serum sample with high bilirubin concentration (images were taken under UV lamp).

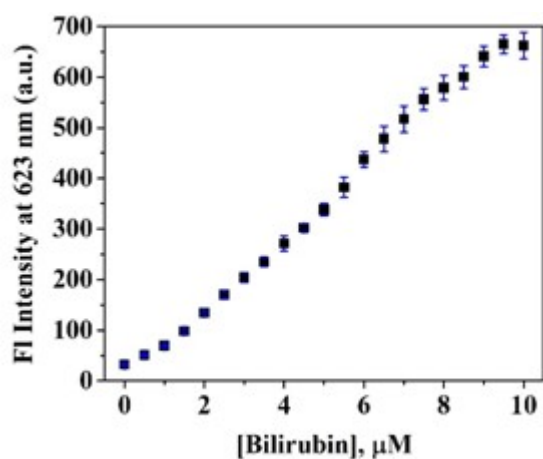

**Fig. S20.** Fluorescence intensity of DEBNox (10  $\mu\text{M}$ ) at 623 nm vs bilirubin (0  $\mu\text{M}$  to 10  $\mu\text{M}$ ) concentration in the reaction buffer (50 mM HEPES, 5% DMSO, pH 7.4) using 100  $\mu\text{M}$   $\text{Fe}^{3+}$  (ex: 580 nm).

**Table S1.** (a) Determination of free bilirubin in different human blood serum specimens using DEBNox incubated at 27 °C for 1 hr. and existing colorimetric diazo-method.

| Serum specimen | Free bilirubin estimated using DEBNox (mg/dl) | Free bilirubin estimated using existing colorimetric diazo-method (mg/dl) |
|----------------|-----------------------------------------------|---------------------------------------------------------------------------|
| Sample-01      | 0.64                                          | 0.74                                                                      |
| Sample-02      | 0.60                                          | 0.71                                                                      |
| Sample-03      | 0.72                                          | 0.81                                                                      |
| Sample-04      | 0.99                                          | 1.10                                                                      |
| Sample-05      | 1.20                                          | 1.32                                                                      |

<sup>a</sup>Average of three replicate experiments UNIT CONVERSION: mg/dl x 16.95 = μmol/l

(b) Recovery of free bilirubin by adding standard amount of 10 μM bilirubin to different human blood serum specimens using two methods.

| Serum specimen | Free bilirubin estimated using DEBNox (mg/dl) |              | Free bilirubin estimated using existing colorimetric diazo-method (mg/dl) |              |
|----------------|-----------------------------------------------|--------------|---------------------------------------------------------------------------|--------------|
|                | Total bilirubin after addition <sup>a</sup>   | Recovery (%) | Total bilirubin after addition <sup>a</sup>                               | Recovery (%) |
| Sample-01      | 1.18 ± 0.03                                   | 96.11        | 1.54 ± 0.04                                                               | 115.88       |
| Sample-02      | 1.14 ± 0.04                                   | 96.23        | 1.51 ± 0.04                                                               | 116.02       |
| Sample-03      | 1.26 ± 0.03                                   | 95.99        | 1.63 ± 0.03                                                               | 116.18       |
| Sample-04      | 1.52 ± 0.02                                   | 96.30        | 1.88 ± 0.03                                                               | 111.21       |
| Sample-05      | 1.74 ± 0.04                                   | 97.13        | 2.11 ± 0.03                                                               | 110.53       |

**Table S2.** Comparative study of fluorescence probe for the detection of bilirubin with their sensing mechanism, method, excitation wavelength and LOD.

| Sl. No. | Method of detection     | Principle                              | LOD           | Wavelength ( $\lambda_{ex}/\lambda_{em}$ ) in nm | References in main manuscript |
|---------|-------------------------|----------------------------------------|---------------|--------------------------------------------------|-------------------------------|
| 1       | Fluorimetry (turn off)  | MOF (UIO-66-PSM) Quenching             | 0.59 $\mu$ M  | 340/470                                          | [22]                          |
| 2       | Fluorimetry (turn off)  | Polyfluorenes, polymer Quenching       | 0.15 $\mu$ M  | 325/~450                                         | [23]                          |
| 3       | Fluorimetry (turn off)  | Gold nanoclusters Quenching            | 248 nM        | 295/380                                          | [24]                          |
| 4       | Fluorimetry (turn off)  | MOF(1-NH <sub>2</sub> @THB) Quenching  | 1.26 pM       | 325/425                                          | [25]                          |
| 5       | Fluorimetry (turn off)  | MoS <sub>2</sub> quantumdots Quenching | 2.10 nM       | 310/392                                          | [26]                          |
| 6       | Fluorimetry (turn off)  | Nanosheets Quenching                   | 41.0 nM       | 274,356,367/550-570                              | [27]                          |
| 7       | Fluorimetry (turn off)  | Gold Nanoclusters Quenching            | 0.61 $\mu$ M  | 487/597                                          | [28]                          |
| 8       | Fluorimetry (turn off)  | MOFs, Zr(IV)-Based Quenching           | 0.45 $\mu$ M  | 254,320/614                                      | [29]                          |
| 9       | Fluorimetry (turn off)  | Quantum Dots Quenching                 | 1.8 0 $\mu$ M | 325/410,470,590                                  | [30]                          |
| 10      | Fluorimetry (on-off-on) | Gold Nanoclusters (2fold)              | 3.42 $\mu$ M  | ~350/~570                                        | [31]                          |
| 11      | Fluorimetry (on-off-on) | S,N-doped carbon dots (3fold)          | 0.12 nM       | 375/452                                          | [32]                          |
| 12      | Fluorimetry (on-off-on) | Copper Nanocluster (2fold)             | 6.62 nM       | 320/405                                          | [33]                          |
| 13      | Fluorimetry (turn on)   | Coumarin-fluorophores (12 Fold)        | 76.0 nM       | 400/515                                          | Our previous work [34]        |
| 14      | Fluorimetry (turn on)   | Benzorhdolfluorophores (20 Fold)       | 33.0 nM       | 580 /623                                         | Present work                  |
